# 1                      **Physiological and Behavioural Effects of Fruit Toxins** 2                      **on Seed-Predating *versus* Seed-Dispersing Congeneric Rodents**

3      Michal Samuni-Blank<sup>a</sup>, Ido Izhaki<sup>b</sup>, M. Denise Dearing<sup>c</sup>, William H. Karasov<sup>d</sup>, Yoram  
 4      Gerchman<sup>e</sup>, Kevin D. Kohl<sup>c</sup>, Petros Lymberakis<sup>f</sup>, Patrice Kurnath<sup>c</sup> and Zeev Arad<sup>a</sup>

5  
 6      <sup>a</sup>Department of Biology, Technion-Israel Institute of Technology, Haifa, Israel.

7      <sup>b</sup>Department of Evolutionary and Environmental Biology, University of Haifa, Haifa,  
 8      Israel.

9      <sup>c</sup>Biology Department, University of Utah, Salt Lake City, UT, USA.

10      <sup>d</sup>Department of Forest and Wildlife Ecology, University of Wisconsin, Madison, WI,  
 11      USA.

12      <sup>e</sup>Department of Biology and Environment, Haifa University in Oranim, Kiryat Tivon,  
 13      Israel.

14      <sup>f</sup>Natural History Museum of Crete, University of Crete, Irakleio, Greece.

15      \* **Corresponding author:** [michal.samuni@gmail.com](mailto:michal.samuni@gmail.com); Tel: 972-54-6520044;  
 16

17      **Short title:** Physiological Effects of Fruit Toxins  
 18

19      **Keywords:** *Acomys*, Alanine aminotransferase, bitter taste, body mass, fruits,  
 20      glucosinolates, liver, pulp, secondary compounds, seeds.  
 21

## 22 **Summary**

23 Fleshy, ripe fruits attract seed dispersers but also seed predators. Although many fruit  
24 consumers (legitimate seed dispersers as well as seed predators) are clearly exposed to  
25 plant secondary compounds (PSCs), their impact on the consumers' physiology and  
26 foraging behaviour has been largely overlooked. Here, we document the divergent  
27 behavioural and physiological responses of three congeneric rodent species in the Middle  
28 East, seed dispersers versus seed predators, to fruit consumption. The fruit pulp of the  
29 desert plant *Ochradenus baccatus* contains high concentrations of glucosinolates (GLSs).  
30 These GLSs are hydrolyzed into active toxic compounds upon contact with the  
31 myrosinase enzyme released from seeds crushed during fruit consumption. *Acomys*  
32 *russatus* and *A. cahirinus* share a desert habitat. *Acomys russatus* acts as an *O. baccatus*  
33 seed predator, and *A. cahirinus* circumvents the activation of the GLSs by orally  
34 expelling vital seeds. We found that between the three species examined, *A. russatus* was  
35 physiologically most tolerant to whole fruit consumption and even *A. minous*, which is  
36 evolutionarily naïve to *O. baccatus*, exhibits greater tolerance to whole fruit consumption  
37 than *A. cahirinus*. However, like *A. cahirinus*, *A. minous* may also behaviourally avoid  
38 the activation of the GLSs by making a hole in the pulp and consuming only the seeds.  
39 Our findings demonstrate that seed predators have a higher physiological tolerance than  
40 seed dispersers when consuming fruits containing toxic PSCs. The findings also  
41 demonstrate the extreme ecological/evolutionary lability of this plant-animal symbiosis to  
42 shift from predation to mutualism and vice versa.

43

## Introduction

Fleshy, ripe fruit pulp is a nutritious and easily digestible reward that facilitates seed dispersal by animals (Herrera, 1982; Corlett and Lucas 1990; Jordano, 2000; Izhaki, 2002a). However, fruits are likely to attract not only seed dispersers but also seed predators since seeds are also a valuable food source (Corlett and Lucas 1990; Kelt et al. 2004). Eventually, the nature of the plant-animal interaction is determined by the consumers' fruit eating strategy (Corlett and Lucas 1990; Jordano 2000; Dominy and Duncan 2005).

Variability in fruit eating can be a function of multiple parameters, such as age, satiation/hunger, feeding location, seasonality, or availability of other food or water (Levey, 1987; Corlett and Lucas 1990; Gautier-Hion et al. 1993; Kaplin and Moermond 1998; Lambert 1999; Samuni-Blank et al. 2012). In addition, fruits may contain plant secondary compounds (PSCs) to deter seed predators or alter the behaviour of the consumer (Cipollini and Levey 1997, Samuni Blank et al. 2012). In folivorous herbivores, evolutionary pressure has resulted in various behavioural and physiological adaptations for coping with PSCs, thus altering plant-herbivore interactions (McArthur et al. 1991; Dearing et al. 2005; Torregrossa et al. 2011). Similar adaptations to fruit PSCs may also influence fruit eating strategies and thus affect plant-animal interactions.

Glucosinolates (GLSs) are a common class of fruit PSCs. Intact GLSs are generally nontoxic and have limited effect in defending the plant against herbivores and pathogens. The defensive properties of GLSs are enhanced upon their hydrolysis by the myrosinase enzyme causing the release of a toxic aglycone (Hopkins, 2009). These unstable molecules rearrange into several toxic biological compounds (Kjaer, 1976; Das, 2000; Wittstock and Halkier 2002). Generally, GLSs and myrosinases are compartmentalized to prevent toxicity to the plant, and only mix upon damage to tissue (Rask et al. 2000; Hopkins, 2009). The myrosinase-GLS system, also known as the mustard oil bomb, provides plants with an effective defense against generalist herbivores (Wittstock and Halkier 2002).

The GLS-myrosinase defense system is employed in the fleshy fruit of *Ochradenus baccatus* (Resedaceae), a common inhabitant of wadis and depressions in Israeli desert regions (Wolf and Shmida 1995, 1997; Wolf and Burns 2001; Bronstein et al. 2007). The fleshy fruits of *O. baccatus* attract a number of consumers because of its high water and sugar content (Bronstein et al. 2007; Spiegel and Nathan 2007; 2011). However, the seeds of *O. baccatus* also represent a valuable nutrient source, as they are rich in protein (~25% of dry mass). To prevent seed predation, the fruits of *O. baccatus* defend themselves with a unique arrangement of the mustard oil bomb, where GLSs are found in the pulp and the myrosinase enzyme is found in the seeds (Samuni-Blank et al. 2012). Thus, activation of the mustard oil bomb only occurs if consumers crush both seeds and pulp together.

*Ochradenus baccatus* naturally co-occurs with two congeneric rodent species (*Acomys russatus* and *A. cahirinus*) that differ in their interactions with the plant. *Acomys russatus* usually consumes the *O. baccatus* fruit as a whole, acting as a seed predator, while *A. cahirinus* consumes only the pulp and spits the seeds, thus acting as a seed disperser (Samuni-Blank et al. 2012, 2013). These interactions result in differential exposure to activated GLSs between species: *A. russatus* consumes activated GLSs by masticating the seeds, while *A. cahirinus* consumes unactivated GLSs by expelling the seeds. We hypothesize that the variation in physiological adaptations to fruit PSCs drive these plant-animal interactions or vice versa. We also predict that toxin avoiders will show low physiological tolerance to whole fruit consumption and that the frequency of toxin avoiders within a species will be indicative of its tolerance.

The aim of the present study was to test the effects of fruits PSCs (pulp and seeds) on fruit consumers by preventing behavioural circumvention, while testing the physiological impacts of fruit PSCs on seed dispersers versus seed predators. For comparative purposes, we also documented the fruit eating behaviour and physiological responses to fruit PSCs of the Crete spiny mouse (*A. minous*), which is endemic to the Mediterranean island of Crete and evolutionarily naïve to *O. baccatus* fruits. We presented each species with diets containing intact or activated GLSs, and monitored various physiological parameters such as body mass, food intake, dry matter digestibility

and serum markers of liver damage. We predicted that the seed predator, *A. russatus*, would be physiologically more adapted to consume activated toxins, as it regularly does so in the wild. We also predicted that consumption of food containing activated GLSs would result in liver damage.

## Materials and Methods

### Fruit collection

Fruits were collected from the Almog junction site (31°48'N, 35°27'E) located near the Dead Sea and kept at -20°C. For experiments in which separation of pulp and seeds was needed, fruits were kept at 4°C and pulp was manually separated from the seeds within two days of collection and then kept separately at -20°C. Stored fruits maintained active myrosinase and GLSs content (Samuni-Blank et al. 2012). *Ochradenus baccatus* fruiting occurred year-round, with high peaks in May and November 2008-2012. Whole fruits and fruit pulp were thawed before use.

### Animals and Maintenance

The experimental protocols were approved by the University of Haifa Committee of Animal Experimentation (Permit number 096/08). *A. cahirinus* (but see Volobouev et al. 2007 for a discussion on the *A. cahirinus-dimidiatus* complex) and *A. russatus* were from captive breeding colonies (at least three generations in captivity) originally established from individuals trapped in the vicinity of the Dead Sea (31°28'N, 35°23'E). Animals were maintained at the Department of Biology and Environment at the University of Haifa, Oranim. Adult individuals of *A. minous* were live-trapped in the vicinity of Heraklion, Crete, a few days prior to the experiment using Sherman folding traps placed under rocks. All captured *A. minous* individuals were maintained at the Natural History Museum of Crete (Ministry of Environment, Energy and Climate Change, Permit number 117272/586).

Prior to experiments, animals were fed rodent chow (Koffolk serial no. 19510) and fresh carrots as a source of free water, *ad libitum*. During the experiments, animals were

130 housed individually in standard mouse cages (21 X 31 X 13 cm) in a temperature-  
131 controlled room ( $25 \pm 2^{\circ}\text{C}$ ) under a 12:12 h light-dark cycle. All animals were naïve to *O.*  
132 *baccatus* prior to the experiment.

### 133 **Fruit eating behaviour of *A. minous***

134 To determine the fruit eating behaviour of *A. minous*, we placed each single animal ( $n =$   
135 16) in a cage with five fruits over-night. The cage floor was examined the next morning  
136 for intact fruit parts (pulp or seeds) and the fruit eating behaviour was classified as one of  
137 three types: “Whole fruit” - eating pulp and seeds simultaneously and leaving no remains;  
138 “Pulp” - eating the pulp and leaving the seeds; “Seed” - eating the seeds and leaving the  
139 pulp. Individuals that exhibited more than one fruit eating behaviour were classified  
140 according to their dominant strategy. For example, if one individual ate two whole fruits  
141 and only the seeds of the remaining three fruits, then the behaviour was classified as  
142 “Seed”. We define avoiders as individuals that consume either pulp or seeds, but not  
143 both. We define confronters as individuals that consume the whole fruit, pulp and seeds  
144 simultaneously. We recorded the number of intact seeds dropped to the cage floor as well  
145 as the number intact defecated seeds (in the feces). Similar experiments were previously  
146 performed on the two other *Acomys* species (Samuni-Blank et al. 2013).

### 147 **Physiological Effects of Fruit Toxins**

148 To examine the physiological effects of different fruit eating strategies on the three rodent  
149 species, we performed controlled feeding trials. Diets included rodent chow (Koffolk  
150 serial no. 19510) mixed with homogenized pulp (Pulp) or pulp and crushed seeds (Mash;  
151 Table 1). The fruit pulp was free of myrosinase and contained only intact GLSs. The  
152 mash diet combined the GLSs from the pulp and the myrosinase enzyme from the seeds  
153 and therefore contained activated GLSs. To allow the animals to acclimate to the fruit  
154 diet, they were fed a 25% fruit diet (pulp or mash; wet weight) for one day combined  
155 with 75% chow, followed by 50% fruit mixed with 50% chow for three additional days.  
156 Wet food pellets (~50% water content) were prepared from the mashed food and given to  
157 the rodents within an hour of preparation ( $n = 6-8$  individual rodents per treatment).

Each experiment lasted four days. During the experiment, body mass and food intake were measured daily. Excreta and food leftovers were collected every day from the plastic cage floor, dried (50°C for 24 h), and weighed. Dry matter (DM) digestibility of food consumed by an animal was calculated from its DM food intake and fecal DM output as:  $\text{DM digestibility} = (\text{DM food intake} - \text{fecal DM output}) / \text{DM food intake}$ .

The effect of activated GLSs on the liver was studied through measurements of liver enzymes and liver function test. On the last day of the experiment, animals were euthanized with CO<sub>2</sub> and immediately dissected. Blood samples were collected by heart puncture and centrifuged (15 min at 2500 rpm). Blood serum was collected and stored at -20°C. Samples were analyzed for alkaline phosphatase (ALP) and alanine aminotransferase (ALT). ALT is an intracellular enzyme of hepatocytes and its appearance in blood is indicative of possible liver damage. *Acomys cahirinus* and *A. russatus* samples were also analyzed for albumin, gamma-glutamyl transpeptidase (GGT), total bilirubin (Bili. Tot.) and direct bilirubin (Bili. Dir.). Serum levels of all these enzymes and proteins are known to increase when hepatobiliary damage occurs (Ozer et al. 2008). All samples were analyzed at the Laboratory of Clinical Biochemistry in Rambam Medical Center, Haifa.

### Statistical analyses

To test for differences between the fruit eating behaviour of *A. minous*, we used a one proportion Z test. Physiological responses on the last day of the diets (body mass, DM digestibility, liver enzymes, etc.) were compared using two-way ANOVA (with species and diet as main effects) followed by Tukey's Honestly-Significant-Difference (HSD) and linear regression. We also used t-test to compare the slopes of two regression lines. The data were tested for normality prior to statistical comparisons. To evaluate the dispersion of individuals' values from the mean values within each of the species, we calculated the coefficient of variation ( $\text{CV} = 100 \times \text{S.D.} / \text{mean}, \%$ ) of the three *Acomys* species under the two diet treatments. Sample size ( $n = 5-6$  per species) was kept consistent for each of the parameters within each of the diets. For all CV calculations, we used the same sample

186 size, in cases of unequal sample sizes, values from larger groups were removed at  
187 random.

188 In all cases, significance level was set at  $P < 0.05$ . All data were reported as means  
189  $\pm$  standard error (SE). Statistical analysis was conducted using SPSS 19.0 (SPSS, USA).

190

## 191 **Results**

### 192 **Fruit eating behaviours**

193 *Acomys russatus* exhibited the "Whole fruit" behaviour (confronter, consumed pulp and  
194 seeds mashed together; movie available at: <http://y2u.be/RcLDPst87vs>) whereas *A.*  
195 *cahirinus* exhibited the "Pulp" behaviour (avoider, consumed the pulp and spat the seeds;  
196 movie available at: [http://y2u.be/25XI\\_mtglPU](http://y2u.be/25XI_mtglPU)) (Samuni-Blank et al. 2013). Five  
197 individuals of *A. minous* left the fruit untouched, and were not included in the analysis.  
198 Interestingly, the most common fruit eating behaviour of *A. minous* differed from that of  
199 the other two *Acomys* species (Table 2). Eight out of eleven individuals employed, at  
200 least once, the "Seed" behaviour, by making a hole in the pulp, eating the seeds, and  
201 leaving the pulp on the cage floor (movie available at: <http://y2u.be/yvHL7oA0HbM>).  
202 The "Seed" behaviour was the dominant behaviour for six of these eight. From these six  
203 individuals, four individuals exclusively exhibited the "Seed" (avoider) behaviour and the  
204 remaining two individuals alternated between the "Seed" and "Whole fruit" behaviours.

205 A smaller proportion of *A. minous* (36.6%) preferred the "Whole fruit" (confronter)  
206 behaviour (movie available at: <http://y2u.be/ghVA7Ibhu8c>). Half used the "Seed"  
207 strategy exclusively and the others alternated between "Seed" and "Whole fruit"  
208 behaviour. Only a single individual used only the "Pulp" (avoider) behaviour (movie  
209 available at: <http://y2u.be/rb1vC3EbnP8>). There was no significant difference between  
210 these feeding behaviours (avoider vs. confronter;  $Z = 0.89$ ,  $n = 11$ , N.S). For all  
211 individuals, no intact seeds were found in the feces. Overall, we characterized *A. minous*  
212 as avoider since more than 50% of the individuals avoided the consumption of the whole  
213 fruit and its activated PSCs.



## 214 Physiological Effects of Fruits

215 **Body mass:** Final body mass (% of initial) differed significantly among species  
216 ( $F_{2, 39} = 29.5$ ,  $P < 0.001$ ) and between diets ( $F_{1, 39} = 32.5$ ,  $P < 0.001$ ). In addition, there  
217 was a marginal significant diet\*species interaction ( $F_{2, 39} = 3.1$ ,  $P = 0.05$ ). Post-hoc  
218 Tukey's HSD tests showed that on pulp diet *A. cahirinus* and *A. russatus* maintained the  
219 lowest and highest body mass, respectively ( $P < 0.05$ ). Similarly, when fed mash diet, *A.*  
220 *cahirinus* lost significantly more (~20%) of its initial body mass ( $P < 0.05$ ), compared to  
221 *A. minous* and *A. russatus*, which lost ~15% and ~10%, respectively (Table 3).

222 **Food intake:** DM food intake (% body mass/day) differed significantly among  
223 species ( $F_{2, 39} = 26.4$ ,  $P < 0.001$ ) and between diets ( $F_{1, 39} = 23.9$ ,  $P < 0.001$ ). There was a  
224 significant interaction between species and diet ( $F_{2, 39} = 4.1$ ,  $P < 0.05$ ). Post-hoc Tukey's  
225 HSD tests showed that *A. minous* maintained DM intake on the mash diet, while the other  
226 two species exhibited a significant decrease ( $P < 0.05$ ) in DM intake on the mash diet  
227 compared to the pulp diet. In addition, *A. cahirinus* DM intake on the mash diet was  
228 significantly ( $P < 0.05$ ) lower than that of the other two rodents (Table 3).

229 **Digestibility:** There were no significant differences in DM digestibility (Table 3)  
230 among the species ( $F_{2, 37} = 0.09$ , N.S), between diets ( $F_{1, 37} = 1.03$ , N.S), and no  
231 significant interaction ( $F_{2, 37} = 0.49$ , N.S.).

232 There was a positive correlation between body mass at the end of the trial (% of  
233 initial) and total DM food intake for *A. cahirinus* and for *A. russatus*, and a marginally  
234 positive correlation for *A. minous*, while on the pulp diet (Fig. 1A). There were no  
235 significant correlations between intake and final body mass for any species while on the  
236 mash diet. The slopes of regression lines differed significantly for pulp and mash diets in  
237 all three *Acomys* species combined ( $t_{43} = 3.02$ ,  $P < 0.01$ ; Fig. 1B).

238 **Serum biochemical assay:** To our knowledge, we were the first to document  
239 serum markers of liver damage of any *Acomys* species. Serum alanine aminotransferase  
240 (ALT) activity differed significantly by diet ( $F_{1, 38} = 7.9$ ,  $P < 0.01$ ), but not by species ( $F_{2,}$   
241  $38 = 0.1$ , N.S), and there was a significant diet\*species interaction ( $F_{2, 38} = 3.6$ ,  $P < 0.05$ )  
242 (Fig. 2A). Inspecting the figure, it was apparent that serum ALT was elevated about two

times in *A. cahirinus* and *A. minous* when eating mash as compared with pulp, whereas *A. russatus* showed no change on the two diets. Despite the significant effects overall in the ANOVA, none of the post-hoc pair-wise comparisons (Tukey's HSD tests) were significant.

There was a significant difference in serum alkaline phosphatase (ALP) activity (Fig. 2B) among species ( $F_{2, 36} = 8.9$ ,  $P = 0.001$ ) but not between diets ( $F_{1, 36} = 1.8$ , N.S) nor was there a diet\*species interaction ( $F_{2, 36} = 1.6$ , N.S). Post-hoc Tukey's HSD tests showed that *A. russatus* had significantly lower ALP levels than the other two species ( $P < 0.05$ ). All other comparisons were not significant.

For *A. cahirinus* and *A. russatus*, gamma-glutamyl transpeptidase (GGT) activity was significantly different among species ( $F_{1, 28} = 11.7$ ,  $P = 0.002$ ) but not between diet treatments ( $F_{1, 28} = 0.8$ , N.S), and the diet\*species interaction was not significant ( $F_{1, 28} = 0.4$ , N.S). For albumin, total bilirubin (Bili. Tol.) and direct bilirubin (Bili. Dir.), there were no significant differences ( $P > 0.05$ ) between diet treatments, among species or nor was there a diet\*species interactions (Table 4).

**Coefficient of variation:** The coefficient of variation (CV) of all parameters measured for each the three species and the two diets revealed that for eight out of ten different CV values *A. russatus* had the lowest scores (Table 5).

## Discussion

The mustard oil bomb products are known to have numerous physiological effects on animals, such as reduction in growth and in food intake, as well as damage to the liver (Duncan and Milne 1992; Duncan and Milne 1993; Kim et al. 1997; Sørensen et al. 2001). In the present study, we demonstrated that the activated GLSs of *O. baccatus* differentially affected the performance of seed dispersers and predators.

Two of the three studied species, *A. cahirinus* and *A. russatus*, were previously reported to exhibit very different feeding behaviours: *A. cahirinus* separate the pulp from the seeds to avoid the GLSs activation while *A. russatus* consume the whole fruit, pulp

and seeds. Here, we report that a third species, *A. minous*, evolutionary naïve to *O. baccatus* and closely related to *A. cahirinus*, showed a different dominant behaviour: puncturing a hole in the pulp and consuming only the seeds or consuming the whole fruit. This species tended to avoid the consumption of hydrolyzed GLSs (like *A. cahirinus*), but at the same time acted as a seed predator (like *A. russatus*).

In line with its behaviour, *A. minous* also incurred greater physiological effects than *A. russatus*. The physiological results were consistent with each of the species' fruit eating strategies: species with a high percentage of PSC avoiders, i.e. individuals spitting seeds or eating only the seeds (Table 2), exhibited a more negative effect of the mash diet on body mass maintenance. After four days on the mash diet, *A. russatus* (the confronter) maintained ~ 90% of its initial body mass, while avoiders *A. minous* and the seed disperser *A. cahirinus* maintained only ~ 85% and ~ 80% of their initial body mass, respectively. Change in body mass was correlated with food consumption (Fig. 1B) and all species consumed more DM on pulp diet than on mash diet (Table 3).

Although *A. minous* maintained DM intake when feeding on the mash diet, individuals eating that diet lost significantly more body mass than those eating only pulp. This mass loss may stem from the higher energetic costs of detoxifying the hydrolyzed products of the GLSs. Detoxification costs are relatively high, and can be as high as 45% of the basal metabolic costs in specialist herbivores (Sorensen et al. 2005). Accordingly, positive correlations between body mass and food intake for each species were found only on the pulp diet (Fig. 2A). Detoxification costs may also explain the different slopes of the regression lines for the pulp and the mash diets across all *Acomys* species (Fig. 2B).

The very low DM intake of *A. cahirinus*, resulting in significant loss of body mass when feeding on the mash diet, could be explained by the bitter taste of the mustard oil bomb, which serves as a deterrent (Fenwick et al. 1983a,b; Garcia-Bailo et al. 2009). Indeed, taste is a valuable tool to estimate food quality and bitter taste perception prevents animals from ingestion of toxic compounds (Chandrashekar et al. 2000; Nelson et al. 2001; Mueller et al. 2005; Chandrashekar et al. 2006). Previous studies have

demonstrated that rodents are deterred by bitter taste and also that bitter taste inhibits food intake (Glendinning et al. 1990; Scalera, 1992). However, different mice species may have different taste sensitivities (Glendinning et al. 1990). This could partly explain the higher DM intake values and thus the maintenance of higher body mass of *A. russatus* and *A. minous* when feeding on a mash diet. Also, since individuals of *A. minous* in this study were captured in the wild and thus were exposed to a wider range of diets and environmental changes, it is reasonable that they will show a greater tolerance compared to captive-bred *A. cahirinus*.

Fleshy ripe pulp is used by plants as a nutritious and easily digestible reward for seed dispersing animals (Herrera, 1982; Corlett and Lucas 1990; Jordano, 2000; Izhaki, 2002b). We propose that digestibility did not differ between the pulp and mash diets because of the low percentage of seeds (~8%; wet weight) compared to pulp (~92%) in *O. baccatus* fruits.

As an index to the toxicity of the diets, we tested for serum levels of a set of enzymes and proteins known to increase when hepatobiliary damage occurs (ALT, ALP, GGT, albumin, and bilirubin; Ozer et al. 2008). Toxins can cause acute liver cell necrosis, upon damage liver cells, aminotransferases enzymes are released into the bloodstream, and their activity is elevated in the serum (Ozer et al. 2008; Hyder et al. 2013). Indeed, for *A. cahirinus* and *A. minous*, ALT levels were almost two fold higher on the mash diet than on the pulp diet. For *A. cahirinus* there was also an increase in ALP levels on the mash diet. However, on mash diet, *A. cahirinus* refused to eat (total consumption over four days of the experiment was less than 1.5 g) and lost almost 20% of its initial body mass. Severe weight loss is known to be associated with the nonalcoholic fatty liver disease (NAFLD; Salt 2004). Mice with NAFLD have been shown to possess significantly higher levels of ALT and ALP but not albumin (Wang et al. 2011). Thus, the severe weight loss on mash diet can also be the reason for the elevated levels in *A. cahirinus* and *A. minous* (who lost more than 15% of its initial body mass) in which the majority of individuals would typically avoid the consumption of the whole fruit and its activated PSCs.

329 The seed predator *A. russatus* displayed the least variability (i.e., lowest CVs) out  
330 of all the study species, while on different diets and within the various parameters. In  
331 addition, *A. russatus* appeared more tolerant to *O. baccatus* diets in terms of defending  
332 body mass when feeding on the mash diet, which contained the toxic components of the  
333 mustard oil bomb. This result is consistent with other studies showing the ability of *A.*  
334 *russatus* to maintain body mass under various conditions (Shkolnik and Borut 1969; Kam  
335 and Degen 1993; Gutman et al. 2006). Physiologically, the unique adaptive mechanisms  
336 of the diurnal *A. russatus* for desert survival (Haim and Borut 1981; Haim et al. 1994;  
337 Haim et al. 2005; Ehrhardt et al. 2005; Levy et al. 2011) may also explain their low  
338 variability under the different treatments across various examined parameters.

339 Despite more than three generations of *O. baccatus* naivety, the seed predator, *A.*  
340 *russatus*, was the least affected by fruits PSCs, suggesting its higher physiological  
341 tolerance to the activated GLSs, while *A. cahirinus*, the seed disperser, was most  
342 negatively affected. The ability of the wild-caught, naïve *A. minous*, and the captive-bred  
343 *A. cahirinus* to behaviourally circumvent the activation of the GLSs, and the  
344 physiological ability of *A. russatus* to tolerate the mustard oil bomb, demonstrate the  
345 wide ecological/evolutionary lability of this plant-animal symbiosis to shift from  
346 predation to mutualism and vice versa.

347

348 **List of abbreviations**

|     |           |                                     |
|-----|-----------|-------------------------------------|
| 349 | ALP       | Serum alkaline phosphatase          |
| 350 | ALT       | Serum alanine aminotransferase      |
| 351 | Bil. Dir. | Direct bilirubin                    |
| 352 | Bil. Tot. | Total bilirubin                     |
| 353 | DM        | Dry matter                          |
| 354 | GGT       | Serum gamma-glutamyl transpeptidase |
| 355 | GLSs      | Glucosinolates                      |
| 356 | NAFLD     | Nonalcoholic fatty liver disease    |
| 357 | PSCs      | Plant secondary compounds           |

358

## Acknowledgements

We are grateful to the members of the Oranim College animal house staff, particularly to Nina Dainov, Nir Keshales, Raya Magharbeh and Manolis Papadimitrakis for their help with the animal capture and animal maintenance. We are also grateful to the Greek Ministry of Environment, Energy and Climate Change.

## Funding

Support for this study was available through grants from the U.S.-Israel Bi-National Science Foundation Grant [2006043], Israel Science Foundation [189/08], Middle East Regional Cooperation [TA-MOU-08-M28-013], National Science Foundation IOS [0817527] and Aharon Katzir Student Travel Fellowship. Material support of the Technion-Israel Institute of Technology, Oranim College and the Greek Ministry of Environment, Energy and Climate Change.

## References

- Barome, P. O., Lymberakis, P., Monnerot, M. and Gautun, J. C.** (2000) Cytochrome b sequences reveal *Acomys minous* (Rodentia, Muridae) paraphyly and answer the question about the ancestral karyotype of *Acomys dimidiatus*. *Molec. Phylogenet. Evol.* **18**, 37-46.
- Bronstein, J. L., Izhaki, I., Nathan, R., Tewksbury, J. J., Spiegel, O., Lotan, A., Altstein, O., Dennis, A. J., Schupp, E. W. and Green, R. J.** (2007) Fleshy-fruited plants and frugivores in desert ecosystems. In: *Seed dispersal: theory and its application in a changing world* (ed. A. J. Dennis, E. W. Schupp, R. J. Green and D. W. Westcott), pp. 148-177. Wallingford: Cab International.
- Chandrashekar, J., Hoon, M. A., Ryba, N. J. and Zuker, C.S.** (2006) The receptors and cells for mammalian taste. *Nature* **444**, 288-294.
- Chandrashekar, J., Mueller, K. L., Hoon M. A., Adler, E., Feng, L., Guo, W., Zuker, C. S. and Ryba, N. J. P.** (2000) T2Rs function as bitter taste receptors. *Cell* **100**, 703-711.
- Corlett, R. T. and Lucas, P. W.** (1990) Alternative seed-handling strategies in primates: Seed-spitting by long-tailed macaques (*Macaca fascicularis*). *Oecologia* **82**, 166-171.
- Das, S., Tyagi, A. K. and Kaur, H.** (2000) Cancer modulation by glucosinolates: A review. *Curr. Sci.* **79**, 1665-1671.
- Dearing, M. D., Foley, W. J. and McLean, S.** (2005) The influence of plant secondary metabolites on the nutritional ecology of herbivorous terrestrial vertebrates. *Annu. Rev. Ecol. Evol. Syst.* **36**, 169-189.
- Dominy, N. J. and Duncan, B. W.** (2005) Seed-spitting primates and the conservation and dispersion of large-seeded trees. *Int. J. Primatol.* **26**, 631-649.
- Duncan, A. J. and Milne, J. A.** (1992) Effect of long-term intra-ruminal infusion of the glucosinolate metabolite allyl cyanide on the voluntary food intake and metabolism of lambs. *J. Sci. Food Agric.* **58**, 9-14.



- 400 **Duncan, A. J. and Milne, J. A.** (1993) Effects of oral administration of *brassica*  
 401 secondary metabolites, allyl cyanide, allyl isothiocyanate and dimethyl disulphide, on  
 402 the voluntary food intake and metabolism of sheep. *Brit. J. Nutr.* **70**, 631-645.
- 403 **Ehrhardt, N., Heldmaier, G. and Exner, C.** (2005) Adaptive mechanisms during food  
 404 restriction in *Acomys russatus*: the use of torpor for desert survival. *J. Comp. Physiol.*  
 405 *B* **175**, 193-200.
- 406 **Fenwick, R., Heaney, R. K. and Mullin, W. J.** (1983a) Bitterness in Brussels sprouts  
 407 (*Brassica oleracea L var gemnifera*): the role of glucosinolates and their breakdown  
 408 products. *J. Sci. Food Agric.* **34**, 73-80.
- 409 **Fenwick, R., Heaney, R. K. and Mullin, W. J.** (1983b) Glucosinolates and their  
 410 breakdown products in food and food plants. *Crit. Rev. Food Sci. Nutr.* **18**, 123-201.
- 411 **Garcia-Bailo, B., Toguri, C., Eny, K. M. and El-Sohemy A.** (2009) Genetic variation  
 412 in taste and its influence on food selection. *J. Integr. Biol.* **13**, 69-81.
- 413 **Gautier-Hion, A., Gautier, J.-P. and Maisels, F.** (1993) Seed dispersal versus seed  
 414 predation: An inter-site comparison of two related African monkeys. *Vegetatio* **107**,  
 415 237-244.
- 416 **Glendinning, J. I., Brower, L. P. and Montgomery, C. A.** (1990) Responses of three  
 417 mouse species to deterrent chemicals in the monarch butterfly. I. Taste and toxicity  
 418 tests using artificial diets laced with digitoxin or monocrotaline. *Chemoecol.* **1**, 114-  
 419 123.
- 420 **Gutman, R., Choshniak, I. and Kronfeld-Schor, N.** (2006) Defending body mass  
 421 during food restriction in *Acomys russatus*: a desert rodent that does not store food.  
 422 *Am. J. Physiol. Regul. Integr. Comp. Physiol.* **290**, 881-891.
- 423 **Haim, A., Alma, A., and Neuman, A.** (2005) Body mass is a thermoregulatory  
 424 adaptation of diurnal rodents to the desert environment. *J. Therm. Biol.* **31**, 168-171.
- 425 **Haim, A. and Borut, A.** (1981) Heat production and dissipation in golden spiny mice,  
 426 *Acomys russatus*, from two extreme habitats. *J. Comp. Physiol.* **142**, 445-450.

- 427 **Haim, A., Yedidia, I., Haim, D. and Zisapel, N.** (1994) Photoperiodicity in daily  
 428 rhythms of body temperature, food and energy intake of the golden spiny mouse  
 429 (*Acomys russatus*). *Isr. J. Zool.* **40**, 145-150.
- 430 **Herrera, C. M.** (1982) Defense of ripe fruit from pests: its significance in relation to  
 431 plant-disperser interactions. *Am. Nat.* **120**, 218-241.
- 432 **Hopkins, R. J., van Dam, N. M. and van Loon, J. A.** (2009) Role of glucosinolates in  
 433 insect-plant relationship and multitrophic interactions. *Annu. Rev. Entomol.* **54**, 57-83.
- 434 **Hyder, M. A., Hasan, M. and Mohieldein, A. H.** (2013). Comparative Levels of ALT,  
 435 AST, ALP and GGT in Liver associated Diseases. *Eur. J. Exp. Biol.* **3**, 280-284.
- 436 **Izhaki, I.** (2002a) Emodin - a secondary metabolite with multiple ecological functions in  
 437 higher plants (a review). *New Phytol.* **155**, 205-217.
- 438 **Izhaki, I.** (2002b) The role of fruit traits in determining fruit removal in east  
 439 Mediterranean ecosystems. In: *Seed Dispersal and Frugivory: Ecology, Evolution*  
 440 *and Conservation* (ed. D. J. Levey, W. R. Silva and M. Galetti), pp. 161-175.  
 441 Wallingford: CAB International.
- 442 **Jordano, P.** (2000) Fruit and frugivory. In: *Seeds: The Ecology of Regeneration in Plant*  
 443 *Communities* (ed. M. Fenner M), pp. 125-166. 2<sup>nd</sup> edition. Wallingford: CAB  
 444 International.
- 445 **Kam, M. and Degen, A. A.** (1993) Effect of dietary performed water on energy and  
 446 water budgets of two sympatric desert rodents, *Acomys russatus* and *Acomys*  
 447 *cahirinus*. *J. Zool.* **231**, 51-59.
- 448 **Kaplin, B. A. and Moermond, T. C.** (1998) Variation in seed handling by two species  
 449 of forest monkeys in Rwanda. *Am. J. Primatol.* **45**, 83-101.
- 450 **Kelt, D. A., Meserve, P. L. and Gutiérrez, J. R.** (2004) Seed removal by small  
 451 mammals, birds and ants in semi arid Chile, and comparison with other systems. *J.*  
 452 *Biogeogr.* **31**, 931-942.

- 453 **Kim, D. J., Han, B. S., Ahn, B., Hasegawa, R., Shirai, T., Ito, N. and Tsuda, H.**  
 454 (1997) Enhancement by indole-3-carbinol of liver and thyroid gland neoplastic  
 455 development in a rat medium-term multiorgan carcinogenesis model. *Carcinogenesis*  
 456 **18**, 377-381.
- 457 **Kjaer, A.** (1976) Glucosinolates in the Cruciferae. In: *The Biology and Chemistry of the*  
 458 *Cruciferae* (ed. J. G. Vaughan, A. J. Macleod and B. M. G. Jones), pp. 207-219.  
 459 London: Academic Press.
- 460 **Lambert, J. E.** (1999) Seed handling in chimpanzees (*Pan troglodytes*) and redtail  
 461 monkeys (*Cercopithecus ascanius*): Implications for understanding hominoid and  
 462 cercopithecine fruit-processing strategies and seed dispersal. *Am. J. Physiol.*  
 463 *Anthropol.* **109**, 365-386.
- 464 **Levey, D. J.** (1987) Seed size and fruit-handling techniques of avian frugivores. *Am. Nat.*  
 465 **129**, 471-485.
- 466 **Levy, O., Dayan, T. and Kronfeld-Schor, N.** (2011) Interspecific competition and  
 467 torpor in golden spiny mice: two sides of the energy-acquisition coin. *Integ. Comp.*  
 468 *Biol.* **51**, 441-448.
- 469 **McArthur, C., Hagerman, A. E. and Robbins, C. T.** (1991) Physiological strategies of  
 470 mammalian herbivores against plant defenses. In: *Plant defenses against mammalian*  
 471 *herbivory* (ed. R. T. Palo and C. T. Robbins), pp. 103-114. Boca Raton: CRC Press.
- 472 **Mueller, K. L., Hoon, M. A., Erlenbach, I., Chandrashekar, J., Zuker, C. S. and**  
 473 **Ryba, N. J. P.** (2005) The receptors and coding logic for bitter taste. *Nature* **434**,  
 474 225-229.
- 475 **Nelson, G., Hoon M. A., Chandrashekar, J., Zhang, Y., Ryba, N. J. P. and Zuker, C.**  
 476 **S.** (2001) Mammalian sweet taste receptors. *Cell* **106**, 381-390.
- 477 **Nicolas, V., Granjon, L., Duplantier, J.-M., Cruaud, C. and Dobigny, G.** (2009)  
 478 Phylogeography of spiny mice (genus *Acomys*, Rodentia: Muridae) from the south-

western margin of the Sahara with taxonomic implications. *Biol. J. Linnean Soc.* **98**,  
29-46.

**Ozer, J., Ratner, M., Shaw, M., Bailey, W. and Schomakerd, S.** (2008) The current  
state of serum biomarkers of hepatotoxicity. *Toxicology* **245**, 194-205.

**Rask, L., Andreasson, E., Ekbom, B., Eriksson, S., Pontoppidan, B. and Meijer, J.**  
(2000) Myrosinase: gene family evolution and herbivore defense in Brassicaceae.  
*Plant Mol. Biol.* **42**, 93-113.

**Salt, W. B. II.** (2004) Nonalcoholic fatty liver disease (NAFLD): a comprehensive  
review. *J. Insur. Med.* **36**, 27-41.

**Samuni-Blank, M., Izhaki, I., Dearing, M. D., Gerchman, Y., Trabelcy, B., Lotan,  
A., Karasov, W. H. and Arad, Z.** (2012) Intraspecific directed deterrence by the  
mustard oil bomb in a desert plant. *Curr. Biol.* **22**, 1218-1220.

**Samuni-Blank, M., Arad, Z., Dearing, M. D., Gerchman, Y., Karasov, W. H. and  
Izhaki, I.** (2013) Friend or foe? Disparate plant-animal interactions of two congeneric  
rodents. *Evol. Ecol.* DOI: 10.1007/s10682-013-9655-x

**Scalera, G.** (1992) Taste preferences, body weight gain, food and fluid intake in singly or  
group-housed rats. *Physiol. Behav.* **52**, 935-943.

**Shkolnik, A. and Borut, A.** (1969) Temperature and water relations in two species of  
spiny mice (*Acomys*). *Am. Soc. Mammal.* **50**, 245-255.

**Sorensen, J. S., McLister, J. D. and Dearing, M. D.** (2005b) Plant secondary  
metabolites compromise the energy budget of specialist and generalist mammalian  
herbivores. *Ecology* **86**, 125-139.

**Sørensen, M., Jensen, B. R., Poulsen, H. E., Deng, X., Tygstrup, N., Dalhoff, K. and  
Loft, S.** (2001) Effects of a Brussels sprouts extract on oxidative DNA damage and  
metabolising enzymes in rat liver. *Food Chem. Toxicol.* **39**, 533-540.

504 **Spiegel, O. and Nathan, R.** (2007) Incorporating dispersal distance into the disperser  
505 effectiveness framework: frugivorous birds provide complementary dispersal to  
506 plants in a patchy environment. *Ecol. Lett.* **10**, 718-72.

507 **Spiegel, O. and Nathan, R.** (2011). Empirical evaluation of directed dispersal and  
508 density-dependent effects across successive recruitment phases. *J. Ecol.* **100**, 392-  
509 404.

510 **Torregrossa, A. M., Azzara, A. V. and Dearing, M. D.** (2011) Differential regulation  
511 of plant secondary compounds by herbivorous rodents. *Funct. Ecol.* **25**, 1232-1240.

512 **Volobouev, V., Auffray, J. C., Debat, V., Denys, C., Gautun, J. C. and Tranier, M.**  
513 (2007) Species delimitation in the *Acomys cahirinus–dimidiatus* complex (Rodentia,  
514 Muridae) inferred from chromosomal and morphological analyses. *Biol. J. Linnean*  
515 *Soc.* **91**, 203-214.

516 **Wang, B., Feng, W. Y., Wang, T. C., Jia, G., Wang, M., Shi, J. W., Zhang, F., Zhao,**  
517 **Y. L. and Chai, Z. F.** (2006) Acute toxicity of nano- and micro-scale zinc powder in  
518 healthy adult mice. *Toxicol. Lett.* **161**, 115-123.

519 **Wang, X., Cao, Y., Fu, Y., Guo, G. and Zhang, X.** (2011) Liver fatty acid composition  
520 in mice with or without nonalcoholic fatty liver disease. *Lipids Health Dis.* **10**, 1-7.

521 **Wittstock, U. and Haliker, B. A.** (2002) Glucosinolate research in the *Arabidopsis* era.  
522 *Trends Plant Sci.* **7**, 263-270.

523

## Legends

**Figure 1.** Change in body mass as a function of total dry matter (DM) intake over all four days of the experiment. (A) *A. cahirinus* ( $n = 16$ ), *A. minous* ( $n = 13$ ) and *A. russatus* ( $n = 16$ ) feeding on pulp or mash of *O. baccatus*. (B) Change in body mass as a function of dry matter (DM) intake on the pulp vs. the mash diet, combining all three species.

**Figure 2.** Serum biochemical assay of *A. cahirinus* ( $n = 8$  for each diet), *A. minous* ( $n = 5-6$  for each diet) and *A. russatus* ( $n = 8$  for each diet) on pulp (white bars) and mash (gray bars) *O. baccatus* fruits for (A) Alanine aminotransferase (ALT) and (B) Alkaline phosphatase (ALP). Data are presented as means  $\pm$  SE.

**Table 1.** Diet components (%).

**Table 2.** Summary of the fruit-eating behaviour of the three congeneric species of *Acomys*. \*5 other individuals did not consume any part of the fruit and were excluded.

**Table 3.** Summary of the feeding trials. Body mass (% of initial), dry matter intake (% body mass/day) and dry matter digestibility (%) of *A. cahirinus*, *A. minous*, and *A. russatus* on day 4 of the trial. Similar letters adjacent to means indicate no significant difference ( $P > 0.05$ ) among the means (two-way ANOVA followed by Tukey's HSD). Data are means  $\pm$  SE.

**Table 4.** Markers of liver damage of *A. cahirinus* ( $n = 8$  for each diet) *A. russatus* ( $n = 8$  for each diet) on different diets. The parameters measured are gamma-glutamyl

550 transpeptidase (GGT), albumin, total bilirubin (Bili. Tol.) and direct bilirubin (Bili. Dir.)

551 Data are means  $\pm$  SE.

552

553 **Table 5.** Coefficient of variation (%) of the three *Acomys* species in the two diet  
554 treatments of the different parameters: body mass, dry matter intake, dry matter  
555 digestibility, alkaline phosphatase (ALP) and alanine aminotransferase (ALT). The  
556 lowest score for each test within each diet is marked in bold.

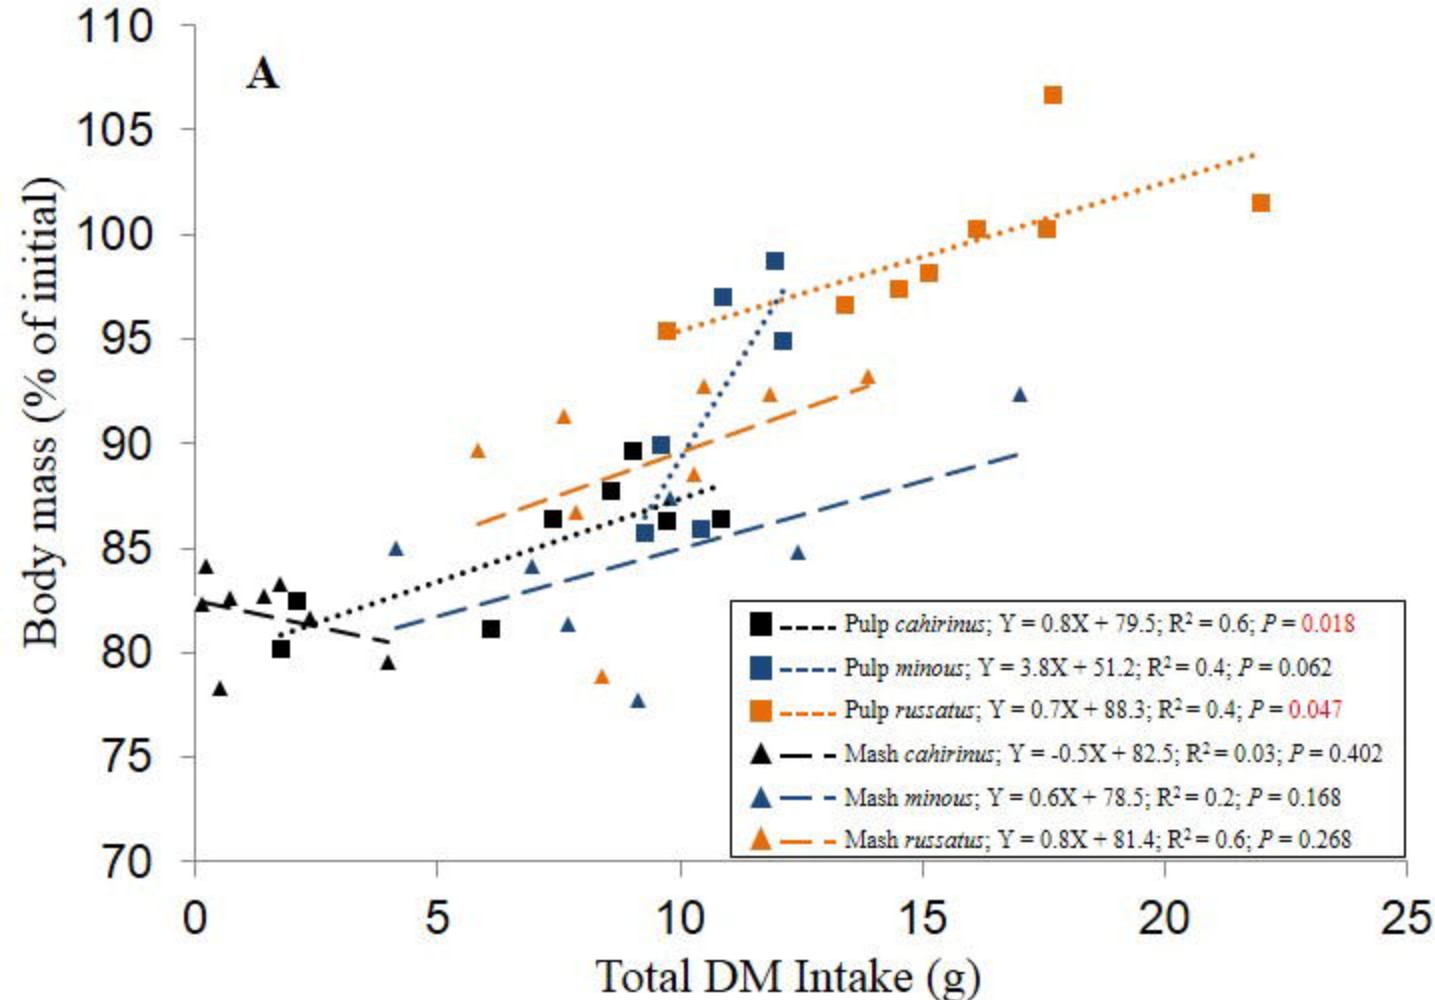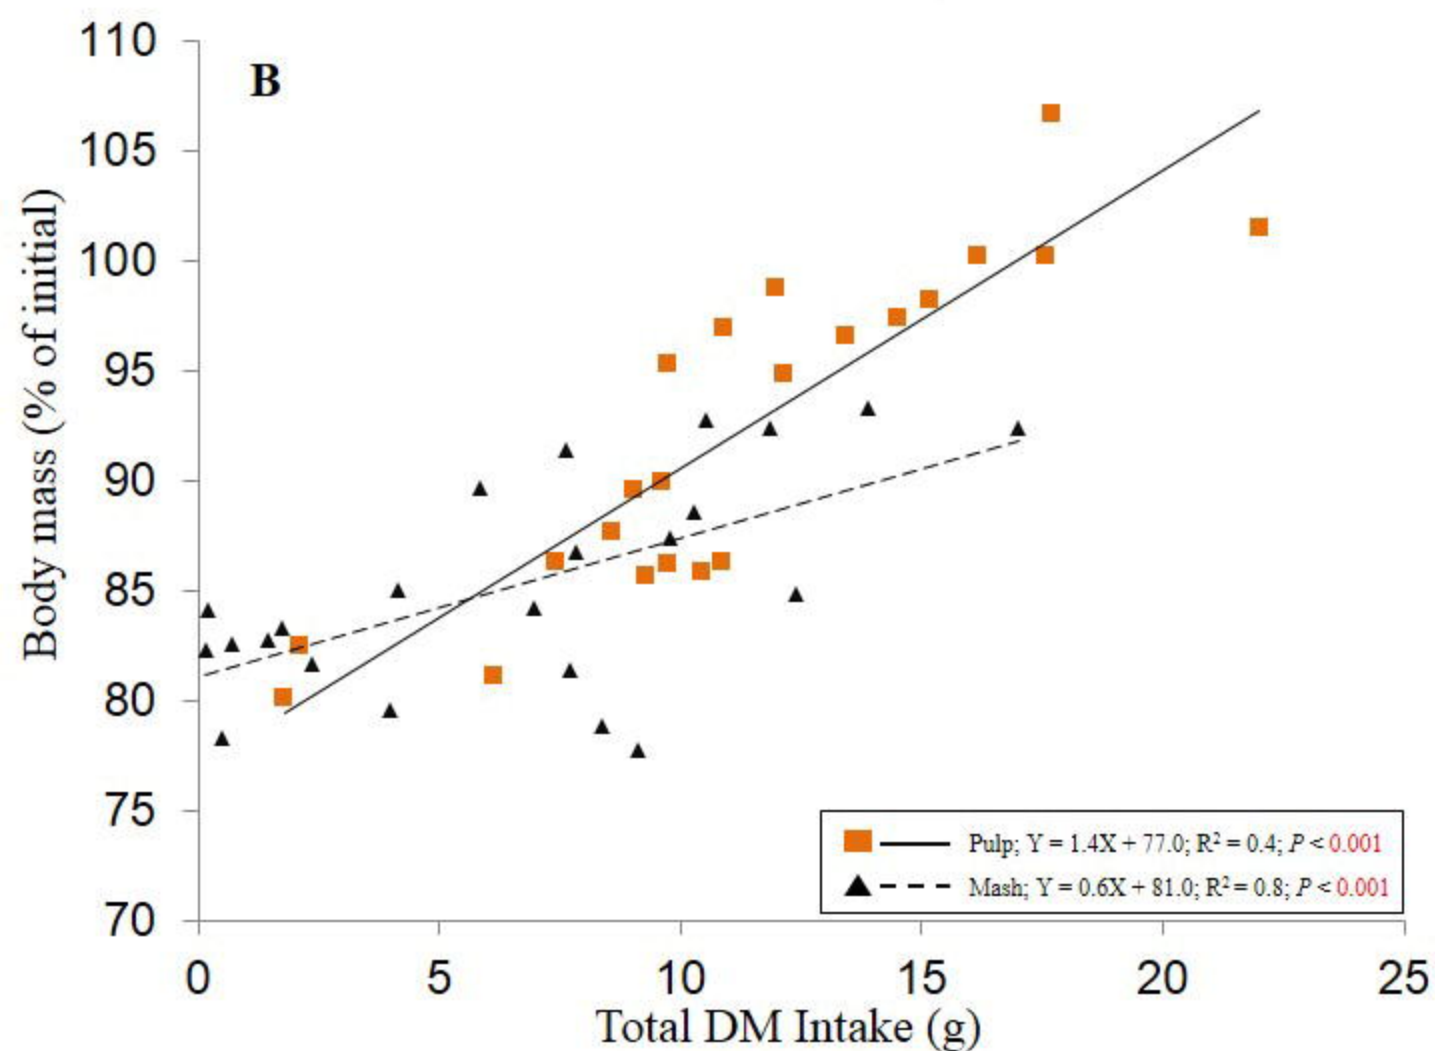



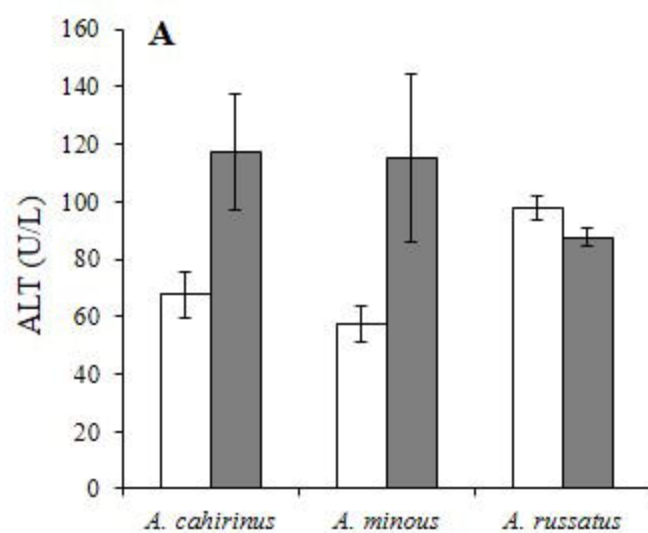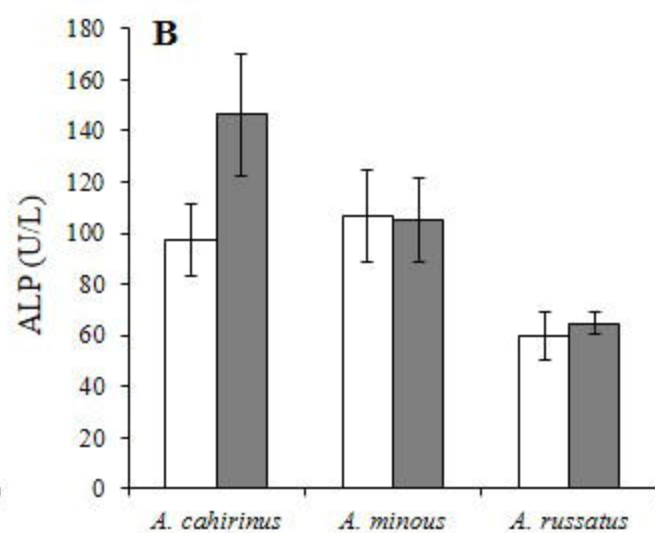

**Table 1.**

|                |              | <b>Mash</b> | <b>Pulp</b> |
|----------------|--------------|-------------|-------------|
| <b>Day 1</b>   | <b>Chow</b>  | 50          | 50          |
|                | <b>Water</b> | 25          | 25          |
|                | <b>Pulp</b>  | 23          | 25          |
|                | <b>Seeds</b> | 2           | 0           |
| <b>Day 2-4</b> | <b>Chow</b>  | 50          | 50          |
|                | <b>Water</b> | 0           | 0           |
|                | <b>Pulp</b>  | 46          | 50          |
|                | <b>Seeds</b> | 4           | 0           |

**Table 2.**

|                     | <b>N</b> | <b>Pulp<br/>(%)</b> | <b>Seed<br/>(%)</b> | <b>Whole<br/>(%)</b> | <b>Reference</b>         |
|---------------------|----------|---------------------|---------------------|----------------------|--------------------------|
| <i>A. cahirinus</i> | 43       | 76.7                | 4.6                 | 18.6                 | Samuni-Blank et al. 2013 |
| <i>A. minous</i>    | 11*      | 9.1                 | 54.5                | 36.4                 | Current study            |
| <i>A. russatus</i>  | 43       | 11.6                | 0                   | 88.4                 | Samuni-Blank et al. 2013 |

**Table 3.**

| Parameters                    | Diet | <i>A. cahirinus</i>      | N | <i>A. minous</i>         | N | <i>A. russatus</i>       | N |
|-------------------------------|------|--------------------------|---|--------------------------|---|--------------------------|---|
| Body Mass                     | Pulp | 85.0 ± 1.2 <sup>CD</sup> | 8 | 92.0 ± 2.3 <sup>B</sup>  | 6 | 99.5 ± 1.3 <sup>A</sup>  | 8 |
|                               | Mash | 81.8 ± 0.7 <sup>D</sup>  | 8 | 84.8 ± 1.7 <sup>CD</sup> | 7 | 89.2 ± 1.3 <sup>BC</sup> | 8 |
| Food intake                   | Pulp | 3.3 ± 0.9 <sup>B</sup>   | 8 | 5.9 ± 1.0 <sup>AB</sup>  | 6 | 8.6 ± 0.5 <sup>A</sup>   | 8 |
|                               | Mash | 0.6 ± 0.2 <sup>C</sup>   | 8 | 5.3 ± 0.7 <sup>B</sup>   | 7 | 4.1 ± 0.6 <sup>B</sup>   | 8 |
| Digestibility <sup>N.S.</sup> | Pulp | 84.9 ± 2.0               | 8 | 82.9 ± 2.1               | 6 | 81.3 ± 1.1               | 8 |
|                               | Mash | 80.3 ± 5.6               | 6 | 80.6 ± 2.6               | 7 | 81.8 ± 2.0               | 8 |

**Table 4.**

| Parameters         | Diet | <i>A. cahirinus</i> | <i>A. russatus</i> |
|--------------------|------|---------------------|--------------------|
| GGT (U/L)          | Pulp | 12.3 ± 1.4          | 8.9 ± 1.7          |
|                    | Mash | 12.0 ± 0.8          | 7.0 ± 0.5          |
| Albumin (g/dL)     | Pulp | 1.1 ± 0.0           | 1.2 ± 0.1          |
|                    | Mash | 1.1 ± 0.0           | 1.1 ± 0.0          |
| Bili. Tot. (mg/dL) | Pulp | 0.1 ± 0.0           | 0.1 ± 0.0          |
|                    | Mash | 0.1 ± 0.0           | < 0.05             |
| Bili. Dir. (mg/dL) | Pulp | < 0.01              | < 0.01             |
|                    | Mash | < 0.01              | < 0.01             |

**Table 5.**

| Parameters    | Diet | Coefficient of variation (%) |                  |                    |
|---------------|------|------------------------------|------------------|--------------------|
|               |      | <i>A. cahirinus</i>          | <i>A. minous</i> | <i>A. russatus</i> |
| Body mass     | Pulp | 3.07                         | 6.15             | <b>1.94</b>        |
|               | Mash | <b>1.92</b>                  | 5.92             | 5.88               |
| Food intake   | Pulp | 68.93                        | 38.74            | <b>17.41</b>       |
|               | Mash | 41.36                        | <b>37.18</b>     | 45.23              |
| Digestibility | Pulp | 7.77                         | 6.29             | <b>2.21</b>        |
|               | Mash | 17.04                        | 9.30             | <b>6.38</b>        |
| ALP           | Pulp | 29.20                        | 37.38            | <b>11.3</b>        |
|               | Mash | 44.82                        | 34.46            | <b>20.57</b>       |
| ALT           | Pulp | 40.26                        | 25.95            | <b>13.18</b>       |
|               | Mash | 49.50                        | 62.07            | <b>9.87</b>        |
